# Supplementary material for: An AIE-based fluorescent probe to detect peroxynitrite levels in human serum and its cellular imaging
Source: Royal Society of Chemistry journal article supplement (doi:10.1039/d4cc01231c), 2024-01-01
Supplement: d4cc01231c1.pdf [file d4cc01231c1.pdf]

1                                   **Electronic Supplementary Information**

2

3           **AIE-based fluorescent probe to detect peroxynitrite levels**  
4                                   **in human serum and its cellular imaging**

5           Jaewon Kim,<sup>‡a</sup> Jiyoung Yoo,<sup>‡a</sup> Byungkook Kim,<sup>‡a</sup> Kyung-Woo Lee,<sup>‡a</sup> Sunghyun Kim,<sup>b</sup> Sukwon  
6                                   Hong<sup>\*b</sup> and Jong Seung Kim<sup>\*a</sup>

7           <sup>a</sup> Department of Chemistry, Korea University, Seoul 02841, Korea

8           <sup>b</sup> Department of Chemistry, Gwangju Institute of Science and Technology, Gwangju 61005, Korea

9           \* Corresponding: shong@gist.ac.kr (SH), jongskim@korea.ac.kr (JSK)

10          ‡ These authors contributed equally.

11

12                                   **Table of contents**

13

14           1. Experimental Section .....S2

15           2. NMR and ESI-MS spectra.....S12

16           3. Solution test experiments .....S23

17           4. *In vitro* experiments.....S27

18           5. Refereneces .....S31

## 23 1. Experimental Section

### 24 1.1. General information and materials

25 Unless otherwise noted, all the materials used for the synthesis were purchased  
26 from the commercial suppliers. 4-Bromo-1,8-naphthalic anhydride (TCI), 2-(2-  
27 Aminoethoxy)ethanol (TCI), Carbon tetrabromide (TCI), 4-formylphenylboronic  
28 acid (ACROS), Tetrakis(triphenylphosphine)palladium(0) (Aldrich), Potassium  
29 carbonate (Samchun), Triphenylphosphine (Alfa), Potassium iodide (Aldrich),  
30 Hydrazine (Aldrich), *N,N*-Dimethylhydrazine (Aldrich) were purchased and used  
31 without further purification. TLC Silica gel 60 F254, 0.25 mm (Merck) was used  
32 for analytical thin layer chromatography. Column chromatography was performed  
33 with silica gel 60 (Merck, 0.063~0.2 mm) as a stationary phase. <sup>1</sup>H and <sup>13</sup>C NMR  
34 spectra were collected in NMR solvents (CDCl<sub>3</sub>) on a Bruker 500 MHz  
35 spectrometer. All chemical shifts are reported in ppm values using the peak of TMS  
36 as an internal reference. The mass spectra were collected on LC/MS-2020 Series  
37 (Shimadzu). Analytical or preparative high-performance liquid chromatography  
38 (HPLC) were performed using Young In ChroZen and the reverse phase column  
39 (SunFire®C18 OBD Prep Column, 5 μm, waters) was equipped. UV-Vis spectra  
40 were recorded on a JASCO V-750 spectrometer, and fluorescence spectra were  
41 obtained using a JASCO FP-8700 instrument. Stock solutions of **Mt-NI-Alde**, **Mt-**  
42 **NI-1** and **Mt-NI-2** were prepared in DMSO. All excitation and emission slit widths  
43 were set at 5 nm. The concentration of each of the samples was fixed at 10 μM in  
44 a total volume of 3 mL.

45

## 46 1.2. UV/Vis and Fluorescence spectroscopic method

47 All UV-vis absorption spectra were obtained using JASCO V-750  
48 spectrophotometer. All fluorescence spectra were collected in JASCO FP-8500  
49 spectrofluorometer. 10 mM stock solutions of **Mt-NI-Alde**, **Mt-NI-1**, **Mt-NI-2** in  
50 DMSO. ONOO<sup>-</sup> stock solution was prepared by a reported method. Briefly, under  
51 stirring at 0°C (Ice bath), a mixture of sodium nitrite (NaNO<sub>2</sub>, 0.6 M) and hydrogen  
52 peroxide (H<sub>2</sub>O<sub>2</sub>, 0.7 M) was acidified with hydrochloric acid (HCl, 0.6 M), and  
53 sodium hydroxide (NaOH, 1.5 M) was added within 1-2 s to make the solution  
54 alkaline. The concentration of ONOO<sup>-</sup> was determined by measuring the  
55 absorption of the solution at 302 nm. The extinction coefficient of the ONOO<sup>-</sup>  
56 solution in 0.1M NaOH is 1670M<sup>-1</sup> cm<sup>-1</sup>, at 302 nm. Other ROS and RNS were  
57 prepared according to literature methods<sup>1, 2</sup>. The concentration of H<sub>2</sub>O<sub>2</sub> was  
58 determined from the absorption with  $\epsilon = 43.6 \text{ M}^{-1} \text{ cm}^{-1}$ , at 240 nm. The source of  
59 hypochlorous acid (HOCl) was commercial bleach. The concentration of HOCl  
60 was determined through spectrophotometrical analysis. The extinction coefficient  
61 of the HOCl solution in 0.1M NaOH is 350 M<sup>-1</sup> cm<sup>-1</sup>, at 292 nm. The concentration  
62 of ClO<sup>-</sup> was determined from the absorption with  $\epsilon = 350 \text{ M}^{-1} \text{ cm}^{-1}$ , at 292 nm.  
63 tert-Butyl hydroperoxide (TBHP) was prepared in deionized distilled water by  
64 diluting 70% TBHP. Peroxyl radical (ROO<sup>•</sup>) was generated from 2,2'-azobis(2-  
65 amidinopropane)dihydrochloride, which was firstly dissolved in deionizer water,  
66 and stirred at r.t. for 30 min. The hydroxyl radical (HO<sup>•</sup>) was generated by the  
67 Fenton reaction. To generate HO<sup>•</sup>, ferrous chloride was added in the presence of 10  
68 equivalents of H<sub>2</sub>O<sub>2</sub>. The concentration of HO<sup>•</sup> was equal to that of Fe(II)  
69 concentration. Singlet oxygen (<sup>1</sup>O<sub>2</sub>) was chemically generated from the  
70 H<sub>2</sub>O<sub>2</sub>/NaOCl (1:1) system in physiological media. O<sub>2</sub><sup>•-</sup> was prepared by adding  
71 potassium superoxide (KO<sub>2</sub>) to dry dimethyl sulfoxide (DMSO) and stirring  
72 vigorously for 10 min. Nitric oxide (NO) was prepared by treating sulfuric acid

73 (3.6 M) solution with sodium nitrite solution (7.3 M) and its stock solution (2.0  
 74 mM) was prepared by bubbling NO into deoxygenated deionized water for 30 min.  
 75 Nitrite ( $\text{NO}_2^-$ ) and nitrate ( $\text{NO}_3^-$ ) were prepared by dissolving sodium nitrite  
 76 ( $\text{NaNO}_2$ ) and sodium nitrate ( $\text{NaNO}_3$ ) in deionized distilled water, respectively.  
 77 Cysteine (Cys), homocysteine (Hcy), and glutathione (GSH) were prepared by  
 78 dissolving L-cysteine, DL-homocysteine, and L-glutathione in deionized distilled  
 79 water, respectively. Stock solutions for cations (10 mM) were prepared by  
 80 dissolving chloride ( $\text{Ca}^{2+}$ ,  $\text{Fe}^{2+}$ ), perchlorate ( $\text{Mg}^{2+}$ ), or sulfate ( $\text{Cu}^{2+}$ ) salt in  
 81 distilled water.

82

### 83 1.3. Synthesis of compound (Mt-NI-1, Mt-NI-2)

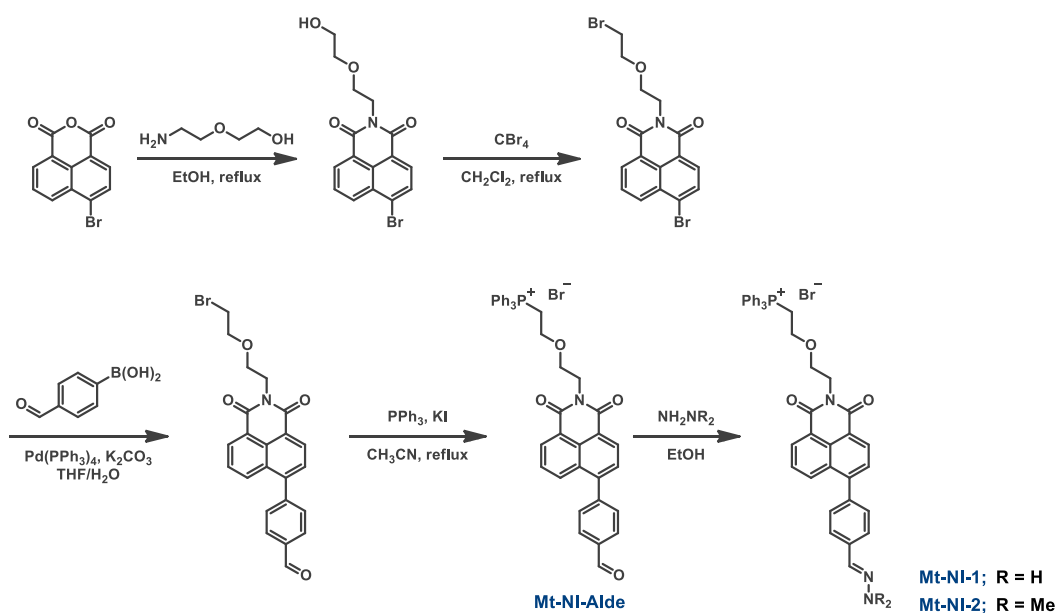

Scheme S1. Overall synthetic route of Mt-NI-1 and Mt-NI-2

### 87 Synthesis of Compound 1

88 4-Bromo-1,8-naphthalic anhydride (2.6 g, 9.4 mmol, 1.0 equiv.) and 2-(2-  
89 Aminoethoxy)-ethanol (0.93 g, 9.4 mmol, 1.0 equiv.) were added to ethanol (50  
90 mL) and stirred for 2 h in reflux condition. The resulting mixture was extracted  
91 with dichloromethane and the organic phase was washed with distilled water. After  
92 dried over Na<sub>2</sub>SO<sub>4</sub>, the solvent was evaporated by rotary evaporator and purified  
93 by column chromatography (eluent: DCM/MeOH = 95/5) then, bright yellow solid  
94 was afforded. <sup>1</sup>H NMR (500 MHz, CDCl<sub>3</sub>) δ 8.65 (dd, *J* = 7.3, 0.9 Hz, 1H), 8.57  
95 (dd, *J* = 8.5, 0.9 Hz, 1H), 8.41 (d, *J* = 7.9 Hz, 1H), 8.03 (d, *J* = 7.9 Hz, 1H), 7.84  
96 (dd, *J* = 8.4, 7.4 Hz, 1H), 4.44 (t, *J* = 5.6 Hz, 2H), 3.86 (t, *J* = 5.6 Hz, 2H), 3.69 (d,  
97 *J* = 4.3 Hz, 2H), 3.67–3.64 (m, 2H), 2.41 (s, 1H) ppm; <sup>13</sup>C NMR (125 MHz, CDCl<sub>3</sub>)  
98 δ 163.90, 133.45, 132.26, 131.43, 131.15, 130.57, 129.05, 128.12, 122.94, 122.07,  
99 72.2, 68.3, 61.86, 39.66 ppm; ESI-MS (*m/z*); [M+Na]<sup>+</sup> calcd. for C<sub>16</sub>H<sub>14</sub>BrNNaO<sub>4</sub>:  
100 385.9998; found: 386.

101

## 102 **Synthesis of Compound 2**

103 A solution of **Compound 1** (300 mg, 0.82 mmol, 1.0 equiv.) and  
104 triphenylphosphine (645 mg, 2.46 mmol, 3.0 equiv.) in dichloromethane was added  
105 dropwise to a solution of carbon tetrabromide (815 mg, 2.46 mmol, 3.0 equiv.) in  
106 dichloromethane at 0°C. The reaction mixture was stirred for 3 h at room  
107 temperature. The mixture was extracted with dichloromethane and distilled water  
108 and evaporated by rotary evaporator. The mixed product was purified by gradient  
109 flash column chromatography with silica gel (eluent: DCM → DCM/MeOH =  
110 97/3). <sup>1</sup>H NMR (500 MHz, CDCl<sub>3</sub>) δ 10.14 (s, 1H), 8.70–8.58 (m, 2H), 8.17 (dd, *J*  
111 = 8.5, 1.0 Hz, 1H), 8.09–8.04 (m, 2H), 7.74–7.65 (m, 4H), 4.45 (t, *J* = 6.0 Hz, 2H),  
112 3.85 (dt, *J* = 13.8, 6.1 Hz, 4H), 3.42 (t, *J* = 6.2 Hz, 2H) ppm; <sup>13</sup>C NMR (125 MHz,  
113 CDCl<sub>3</sub>) δ 163.71, 133.39, 132.16, 131.35, 131.14, 130.69, 130.40, 129.11, 128.10,

114 123.05, 122.18, 70.60, 67.83, 39.22, 30.36 ppm; ESI-MS (m/z); [M+2(H<sub>2</sub>O)+H]<sup>+</sup>  
115 calcd. for C<sub>16</sub>H<sub>17</sub>Br<sub>2</sub>NNaO<sub>5</sub>: 483.9366; found: 482.

116

### 117 **Synthesis of Compound 3**

118 **Compound 2** (212 mg, 0.496 mmol, 1.0 equiv.) and 4-formylphenylboronic acid  
119 (149 mg, 0.992 mmol, 2.0 equiv.) were dissolved into 10 mL of tetrahydrofuran,  
120 and then 3 mL of 2.0 M potassium carbonate solution was added. The mixed  
121 solution was degassed with argon gas for 20 min and then a catalytic amount of  
122 Pd(PPh<sub>3</sub>)<sub>4</sub> was added. The mixture was stirred overnight under the boiling  
123 point of tetrahydrofuran under argon gas. After the reaction, the mixed solution was  
124 cooled and extracted with dichloromethane and distilled water. The organic part is  
125 dried over anhydrous Na<sub>2</sub>SO<sub>4</sub> and evaporated with rotary evaporator. The mixed  
126 product was purified by flash column chromatography with silica gel (eluent:  
127 DCM/MeOH = 99.5/0.5). <sup>1</sup>H NMR (500 MHz, CDCl<sub>3</sub>) δ 10.17 (s, 2H), 8.71–8.62  
128 (m, 4H), 8.22–8.17 (m, 2H), 8.14–8.05 (m, 4H), 7.77–7.68 (m, 8H), 4.48 (t, *J* = 6.0  
129 Hz, 4H), 3.88 (dt, *J* = 14.5, 6.1 Hz, 8H), 3.44 (t, *J* = 6.2 Hz, 4H), 1.76 (s, 1H) ppm;  
130 <sup>13</sup>C NMR (125 MHz, CDCl<sub>3</sub>) δ 191.61, 164.20, 163.99, 145.28, 144.89, 136.20,  
131 132.07, 131.52, 130.80, 130.63, 129.96, 129.75, 128.74, 127.86, 127.31, 122.97,  
132 122.48, 70.61, 67.89, 39.19, 30.40 ppm; ESI-MS (m/z) [M+3(H<sub>2</sub>O)+H]<sup>+</sup> calcd. for  
133 C<sub>23</sub>H<sub>25</sub>BrNO<sub>7</sub>: 506.0809; found: 508.

134

### 135 **Synthesis of Mt-NI-Alde**

136 **Compound 3** (173 mg, 0.382 mmol, 1.0 equiv.) and Triphenylphosphine (501 mg,  
137 1.91 mmol, 5.0 equiv.) were added to 30 mL of acetonitrile solvent and stirred for  
138 5 d in reflux condition. The reaction mixture was extracted with dichloromethane  
139 and distilled water. For better separation, diluted hydrobromic acid was added  
140 around 3 to 5 droplets. The organic part is dried over anhydrous Na<sub>2</sub>SO<sub>4</sub> and

141 evaporated with rotary evaporator. Due to the charged product makes difficult to  
142 conduct flash column chromatography, packing of silica gel was around 5-cm-  
143 height. The mixed product was purified by gradient flash column chromatography  
144 with silica gel (eluent: DCM/MeOH = 99/1 → 97/3 → 95/5).

145  $^1\text{H}$  NMR (500 MHz,  $\text{CDCl}_3$ )  $\delta$  10.18–10.14 (m, 1H), 8.68–8.57 (m, 2H), 8.21 (d, J  
146 = 8.5 Hz, 1H), 8.09 (d, J = 7.9 Hz, 2H), 7.84 (dd, J = 12.9, 8.2 Hz, 6H), 7.73 (dt, J  
147 = 12.9, 8.1 Hz, 8H), 7.64 (td, J = 7.9, 3.2 Hz, 6H), 4.22 (dt, J = 11.5, 5.6 Hz, 2H),  
148 4.13 (t, J = 6.0 Hz, 2H), 4.00 (t, J = 5.6 Hz, 1H), 3.95 (t, J = 5.6 Hz, 1H), 3.47 (t, J  
149 = 6.0 Hz, 2H) ppm;  $^{13}\text{C}$  NMR (125 MHz,  $\text{CDCl}_3$ )  $\delta$  191.73, 163.88, 163.68, 145.50,  
150 144.62, 136.19, 134.70, 133.92, 132.30, 131.51, 130.81, 130.61, 130.27 – 129.93,  
151 129.70, 128.59, 127.91, 127.40, 122.63, 122.12, 119.12, 118.43, 68.03, 64.08,  
152 53.51, 38.92, 25.54, 25.11 ppm; ESI-MS (m/z)  $[\text{M}]^+$  calcd. for  $\text{C}_{41}\text{H}_{33}\text{NO}_4\text{P}$ :  
153 634.2142; found: 634.

154

### 155 **Synthesis of Mt-NI-1**

156 **Mt-NI-Alde** (50 mg, 53.1  $\mu\text{mol}$ , 1.0 equiv.) and hydrazine (5.3  $\mu\text{L}$ , 106  $\mu\text{mol}$ , 2.0  
157 equiv.) were mixed in 10 mL ethanol for 2 h at room temperature. After the reaction,  
158 the mixed solution was cooled and extracted with dichloromethane and distilled  
159 water. The organic part is dried over anhydrous  $\text{Na}_2\text{SO}_4$  and evaporated with rotary  
160 evaporator.  $^1\text{H}$  NMR (500 MHz,  $\text{CDCl}_3$ )  $\delta$  8.61–8.55 (m, 2H), 8.31 (dd, J = 8.5, 1.0  
161 Hz, 1H), 7.90–7.78 (m, 6H), 7.77–7.66 (m, 8H), 7.64–7.57 (m, 6H), 7.51 (d, J =  
162 8.2 Hz, 2H), 5.86–5.56 (m, 2H), 4.29–4.19 (m, 2H), 4.12 (t, J = 6.0 Hz, 2H), 4.00  
163 (s, 1H), 3.95 (s, 1H), 3.47 (t, J = 6.0 Hz, 2H) ppm;  $^{13}\text{C}$  NMR (125 MHz,  $\text{CDCl}_3$ )  $\delta$   
164 163.99, 163.89, 146.83, 141.61, 138.52, 135.82, 134.61, 134.01, 132.90, 131.37,  
165 130.96, 130.29, 129.84, 128.73, 127.78, 126.96, 126.38, 122.57, 121.42, 119.28,  
166 118.59, 68.05, 64.21, 53.45, 38.90, 25.58, 25.16 ppm; ESI-MS (m/z)  $[\text{M}]^+$  calcd.  
167 for  $\text{C}_{41}\text{H}_{35}\text{N}_3\text{O}_3\text{P}$ : 648.2411; found: 648.

168

169 **Synthesis of Mt-NI-2**

170 **Mt-NI-Alde** and *N, N'*-dimethylhydrazine were mixed in 10 mL ethanol for 2 h at  
171 room temperature. After the reaction, the mixed solution was cooled and extracted  
172 with dichloromethane and distilled water. The organic part is dried over anhydrous  
173 Na<sub>2</sub>SO<sub>4</sub> and evaporated with rotary evaporator. <sup>1</sup>H NMR (500 MHz, CDCl<sub>3</sub>) δ  
174 8.59–8.54 (m, 2H), 8.34 (dd, J = 8.5, 1.0 Hz, 1H), 7.81 (ddd, J = 12.9, 5.2, 3.4 Hz,  
175 6H), 7.76–7.66 (m, 8H), 7.64–7.56 (m, 6H), 7.47 (d, J = 8.2 Hz, 2H), 7.30 (s, 1H),  
176 4.17 (dt, J = 11.5, 5.7 Hz, 2H), 4.13 (t, J = 6.0 Hz, 2H), 4.00 (t, J = 5.6 Hz, 1H),  
177 3.95 (t, J = 5.7 Hz, 1H), 3.48 (t, J = 6.0 Hz, 2H), 3.05 (s, 6H) ppm; <sup>13</sup>C NMR (125  
178 MHz, CDCl<sub>3</sub>) δ 164.13, 163.93, 147.25, 137.57, 137.08, 134.58, 134.00, 133.06,  
179 131.31, 130.99, 130.79, 130.06, 128.78, 127.72, 126.82, 125.67, 122.55, 121.19,  
180 119.30, 118.61, 68.07, 64.20, 53.43, 42.77, 38.89, 25.58, 25.16 ppm; ESI-MS (m/z)  
181 [M]<sup>+</sup> calcd. for C<sub>43</sub>H<sub>39</sub>N<sub>3</sub>O<sub>3</sub>P: 676.2724; found: 676.

182

183 **1.4. Determination of the detection limit**

184 The detection limit was determined from the fluorescence titration data based on a  
185 reported method. **Mt-NI-2** (10 μM) was titrated with different concentrations of  
186 peroxyxynitrite (ONOO<sup>-</sup>), the linear relationship between the values of emission  
187 intensity at 450 nm and the concentration of ONOO<sup>-</sup> was fitted based on the  
188 fluorescence titration. Detection limit = 3σ/s Where σ is the standard deviation of  
189 the blank sample and 's' is the slope of the linear regression equation.

190

191 **1.5. Water fraction (f<sub>w</sub>)**

192 The aggregation study was performed following previous research<sup>3</sup>. The  
193 DMF/water solvent system was used to confirm whether **Mt-NI-2** have AIE or  
194 ACQ property. **Mt-NI-2** displayed absorption and emission maxima at



195 approximately 361 nm and 450 nm respectively. The fluorescence spectra were  
196 recorded by taking different  $f_w$  (0, 20, 40, 60, 80, 99.9%) in DMF.

197

## 198 1.6. Measurement of two-photon fluorescence excitation (TPE) cross section

199 The method of measurement was modified based on previously reported protocol<sup>4</sup>.  
200 The two-photon cross sections ( $\eta_2\delta$ ) were determined using the femtosecond (fs)  
201 fluorescence measurement technique. **Mt-NI-Alde** of  $5.0\times 10^{-5}$  M were excited by  
202 a mode-locked Ti:Sapphire pulsed femtosecond laser (Mai Tai HP, Spectra-  
203 Physics), and the two-photon excited fluorescence spectra were recorded with a  
204 Hitachi F-4600 fluorescence spectrophotometer. Rhodamine B of  $1.0\times 10^{-5}$  M  
205 dissolved in MeOH was selected as the reference. The intensities of the two-photon  
206 fluorescence spectra of the reference and sample emitted at the same excitation  
207 wavelength were determined. The value of  $\eta_2\delta$  was calculated using Eq:

$$208 \frac{\langle F(t) \rangle_{\text{probe}}}{\langle F(t) \rangle_{\text{ref}}} = \frac{\frac{1}{2}\phi\eta_2 C \delta \frac{g_p}{f_t} \frac{8n \langle P(t) \rangle_{\text{probe}}^2}{\pi}}{\frac{1}{2}\phi\eta_2 C \delta \frac{g_p}{f_t} \frac{8n \langle P(t) \rangle_{\text{ref}}^2}{\pi}}$$

209 Where  $\eta_2$  and  $\phi$  are the fluorescence quantum efficiency of the dye and the  
210 fluorescence collection efficiency of the measurement system, respectively.  $\langle F(t) \rangle$   
211 is time-averaged fluorescence photon flux. The numerical value of  $g = g_p/(f\tau)$  for a  
212 mode-locked Ti:sapphire laser is approximately  $10^5$  ( $f \sim 100$  MHz and  $\tau \sim 100$  fs).  
213  $\delta$  is the two-photon cross sectional value and  $C$  is the concentration of the dye  
214 solution,  $n$  is there refractive index of the solution.  $\langle P(t) \rangle$  is time-averaged incident  
215 power.

216

## 217 1.7. DFT calculation for sensing mechanism study

218 All the quantum-chemical calculations were done with the Gaussian 16 suite<sup>5, 6</sup>.  
219 The parameter referred to the previous work. The geometry optimizations of the  
220 chemical compounds were performed using time-dependent density functional  
221 theory (TD-DFT) with Becke's three-parameter hybrid exchange function with  
222 Lee-Yang-Parr gradient-corrected correlation functional (B3LYP) and 6-311G(d)  
223 basis set. No constraints to bonds/angles/dihedral angles were applied in the  
224 calculations and all atoms were free to optimize.

225

## 226 **1.8. Cell lines and reagents**

227 HeLa cells obtained from the Korean Cell Line Bank (Seoul, Korea) were cultured  
228 in RPMI 1640 media from HyClone (Chicago, IL, USA). Media were  
229 supplemented with 10% FBS (GIBCO, Grand Island, NY, USA) and 1%  
230 penicillin/streptomycin (GIBCO), and cells were maintained at 37 °C in a  
231 humidified atmosphere with 5% CO<sub>2</sub>. LPS (Lipopolysaccharides) and IFN-γ  
232 human were purchased from Sigma-Aldrich; Merck KGaA, while PMA (Phorbol  
233 12-myristate 13-acetate) was purchased from Thermo Fisher Scientific; MA; USA.

234

## 235 **1.9. Cell viability assay**

236 HeLa cells were seeded at a density of  $5 \times 10^3$  cells per well in 96-well plates and  
237 allowed to adhere for at least 24 h. Following incubation, cells were treated with  
238 **Mt-NI-2** and **Mt-NI-Alde** or 1% DMSO as a control. Cell viability was then  
239 measured after 6 h using the Cellomax™ Cell Viability Kit (Precaregene, Hanam,  
240 Gyeonggi-do, Korea) according to the manufacturer's instructions. Subsequently,  
241 absorbance was measured at 450 nm using a Hidex Sense microplate reader (Hidex,  
242 Cranbourne, Victoria, AU). Triplicate assays were conducted for each condition,  
243 and cytotoxicity was expressed as a percentage relative to the control group. . The

244 experiment was repeated three times, and data were presented as mean values ±  
245 standard deviation (SD). Statistical significance was determined using a student's  
246 t-test and one or two-way ANOVA (GraphPad Prism8 software, CA, USA), with  
247 significance defined as \*P < 0.05.

248

### 249 **1.10. Cellular imaging**

250 HeLa cells ( $2.0 \times 10^4$  per dish) were plated in 35-mm confocal glass bottom dishes  
251 allowed to adhere for 24 h. Following adherence, the cells were pretreated with  
252 LPS (1 µg/ml) and IFN-γ (200 µg/ml) in the media. After 12 h incubation, the cells  
253 were washed twice with fresh media, and 34 µM of PMA was additionally treated  
254 for 30 min before incubation with 5 µM of **Mt-NI-2**, after which fluorescence  
255 emission was recorded. Confocal laser scanning microscope (CLSM) images were  
256 acquired using an Olympus FV3000 confocal laser scanning microscope, with  
257 excitation and emission wavelengths set at 405 nm/480 nm. For mitochondria  
258 staining, 200 nM of MitoTracker® Deep Red FM (Invitrogen, CA, USA) was treated for  
259 30 min before imaging (Ex: 644 nm/ Em: 665 nm). All the images and colocalization  
260 analysis were analyzed using Image J software (Rasband, W.S., ImageJ, U. S. National  
261 Institutes of Health, Bethesda, Maryland, USA, <https://imagej.net/ij/>, 1997-2018).

262

263 **2. NMR and ESI-MS spectra**

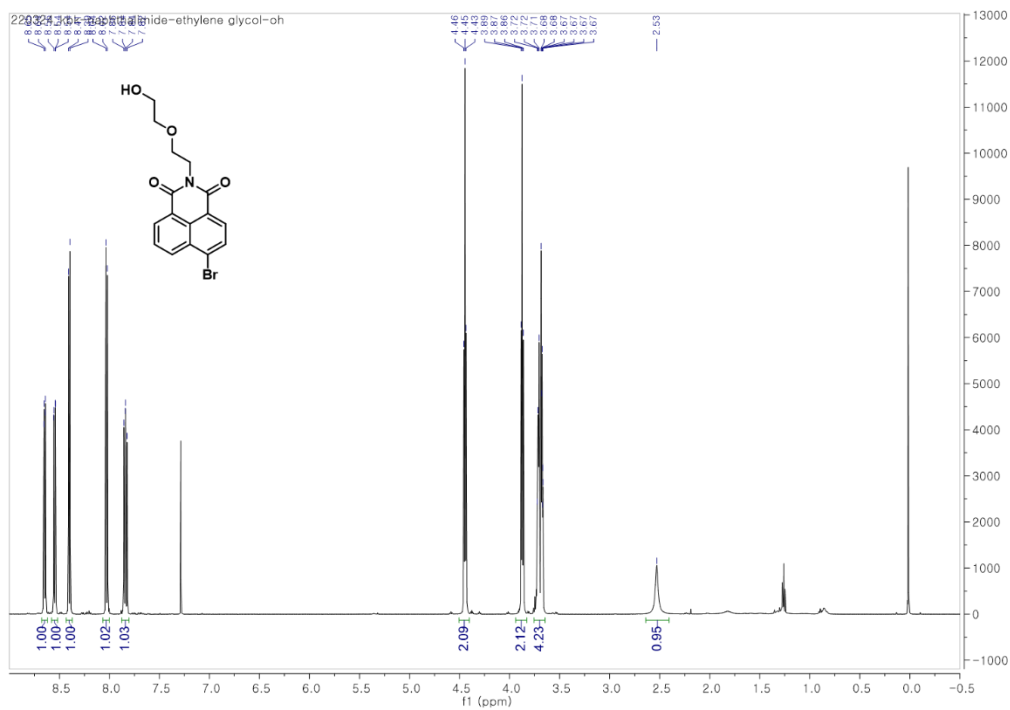

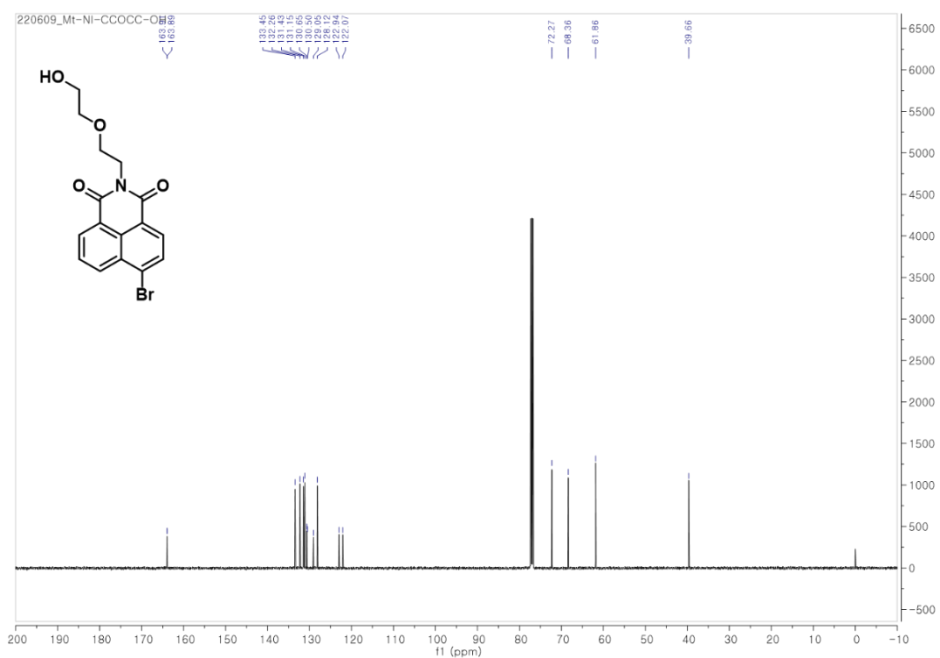

267 **Figure S2.**  $^{13}\text{C}$  NMR ( $\text{CDCl}_3$ , 125 MHz) spectrum of Compound 1

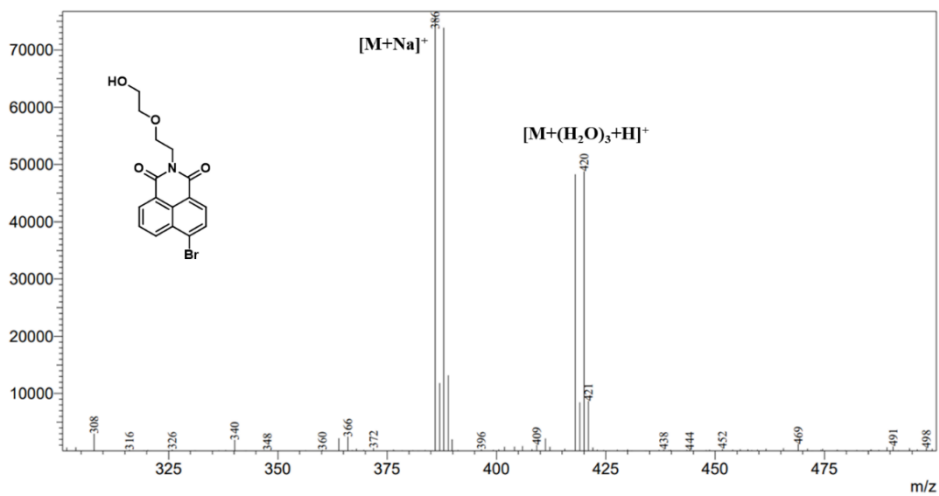

269 **Figure S3.** ESI-MS spectrum of Compound 1

270



275

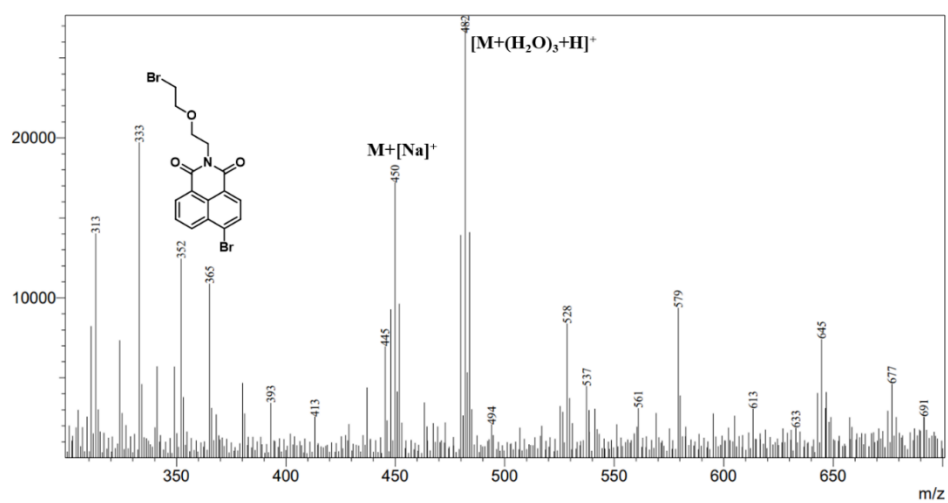

276

277

Figure S6. ESI-MS spectrum of Compound 2

278

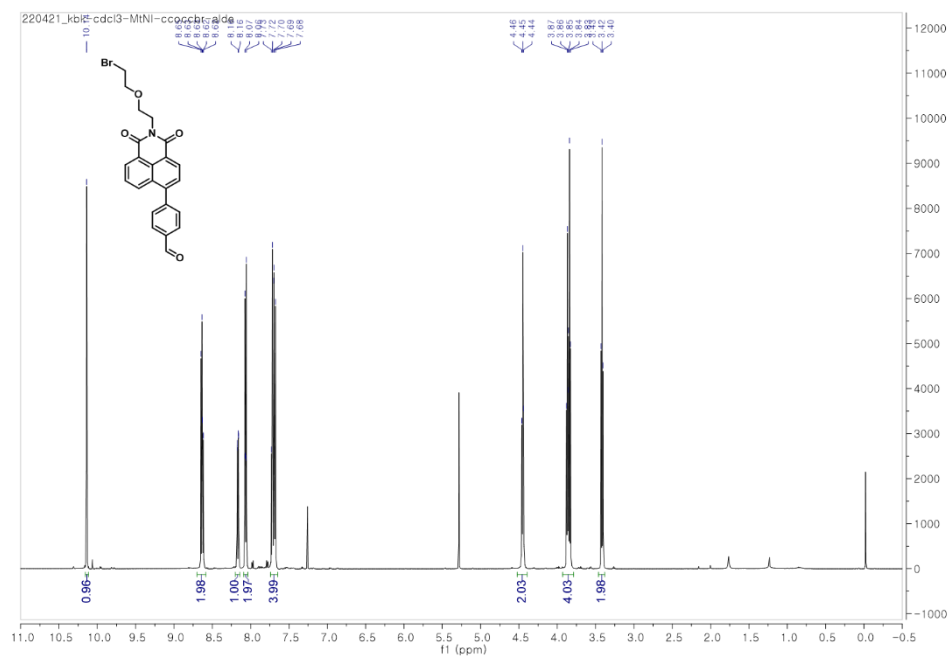

279

280

Figure S7. <sup>1</sup>H NMR (CDCl<sub>3</sub>, 500 MHz) spectrum of Compound 3

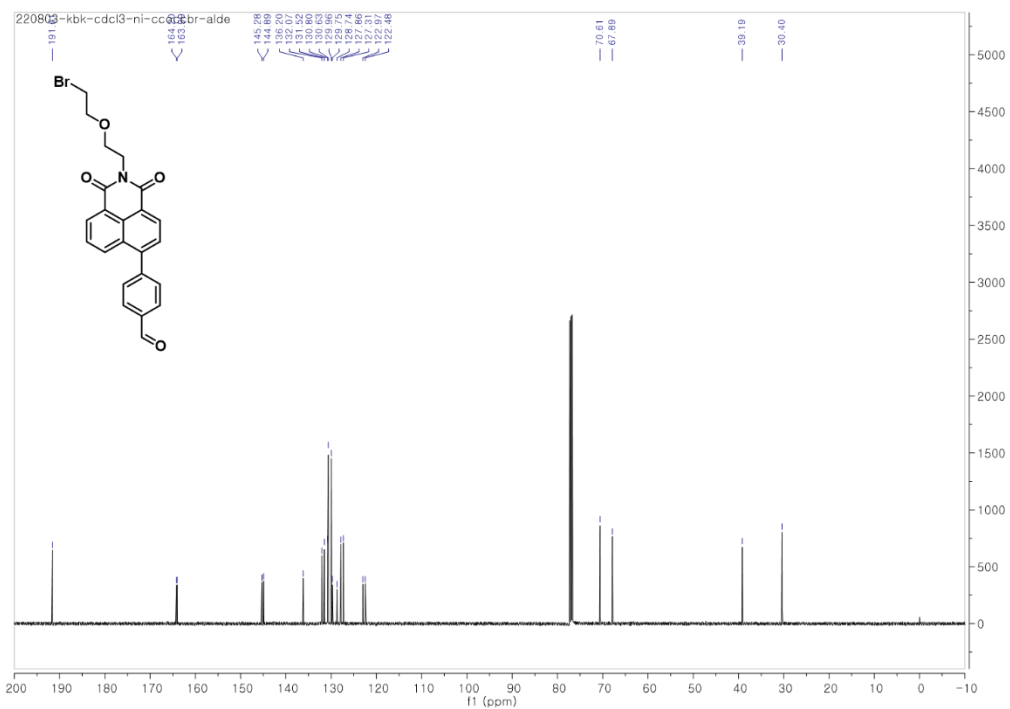

281

282

Figure S8.  $^{13}\text{C}$  NMR ( $\text{CDCl}_3$ , 125 MHz) spectrum of Compound 3

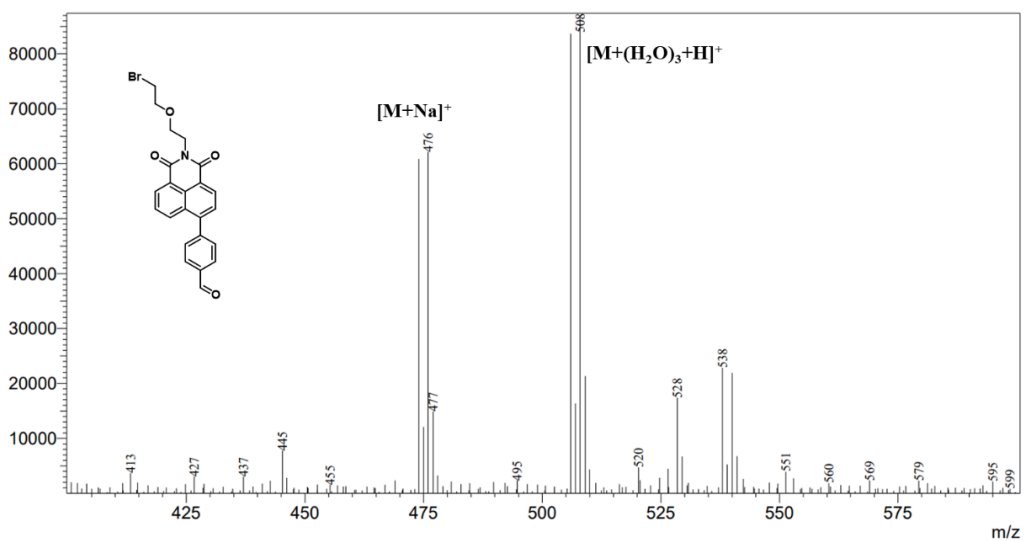

283

284

Figure S9. ESI-MS spectrum of Compound 3

285



286

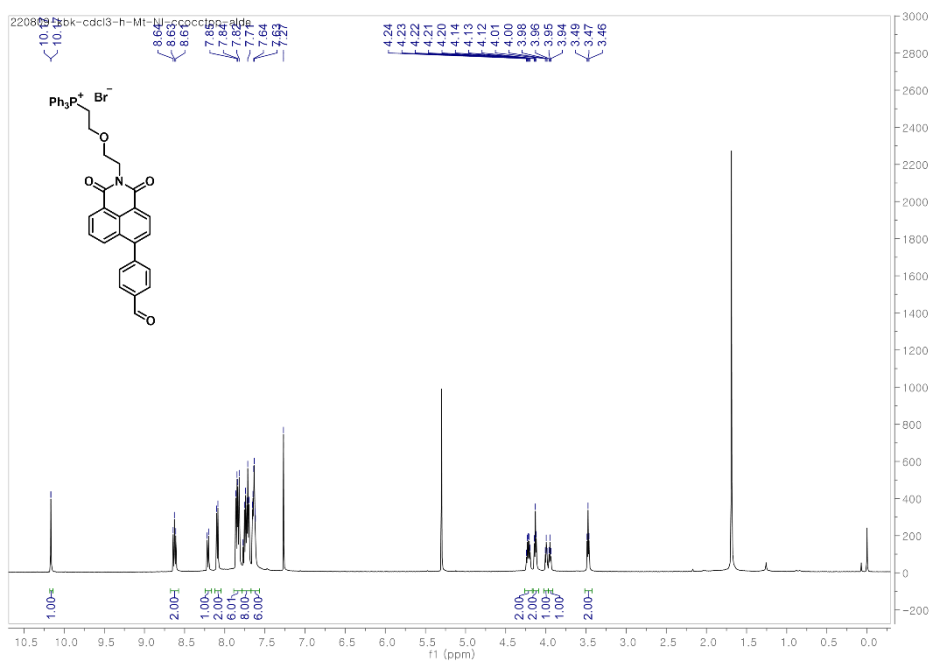

287

**Figure S10.** <sup>1</sup>H NMR (CDCl<sub>3</sub>, 500 MHz) spectrum of **Mt-NI-Alde**

288

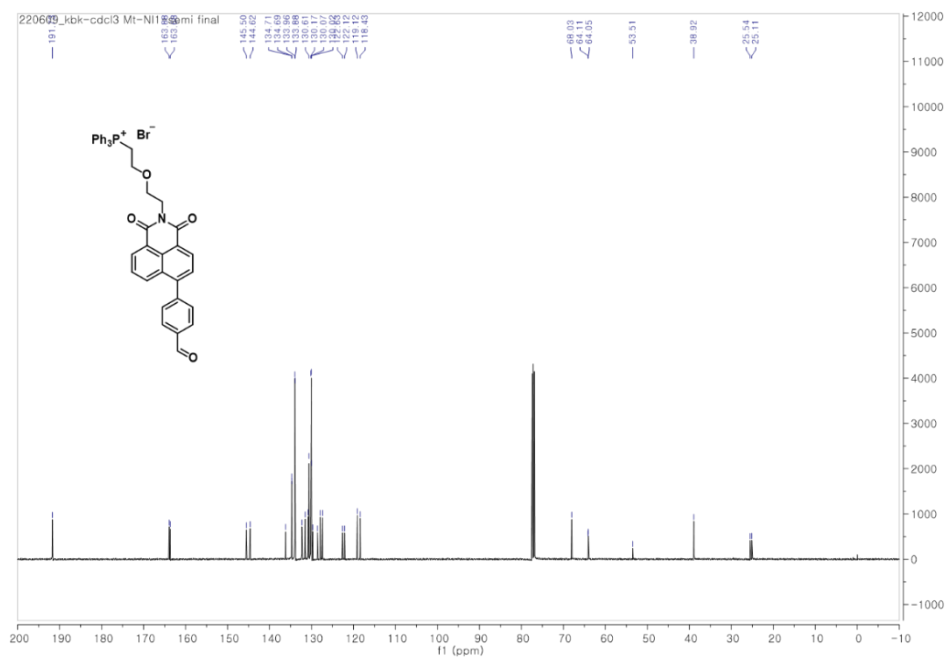

289

**Figure S11.** <sup>13</sup>C NMR (CDCl<sub>3</sub>, 125 MHz) spectrum of **Mt-NI-Alde**

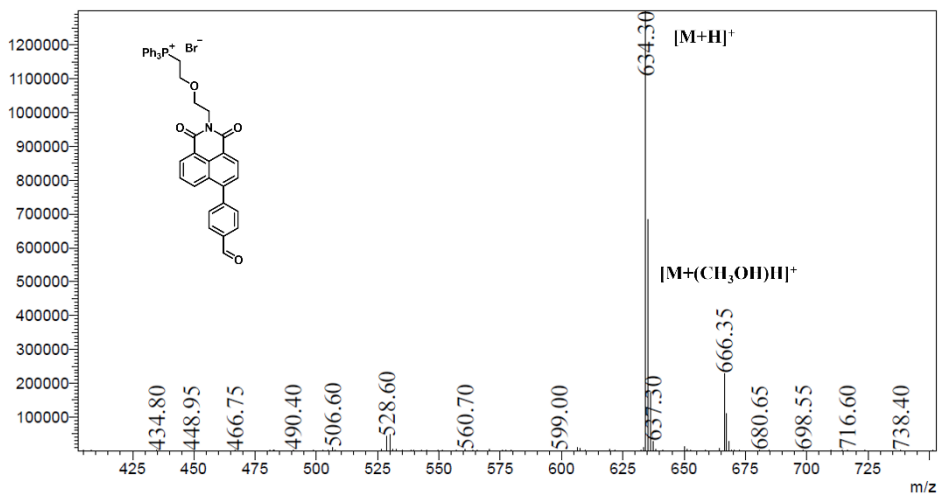

290

291

**Figure S12.** ESI-MS spectrum of Mt-NI-Alde

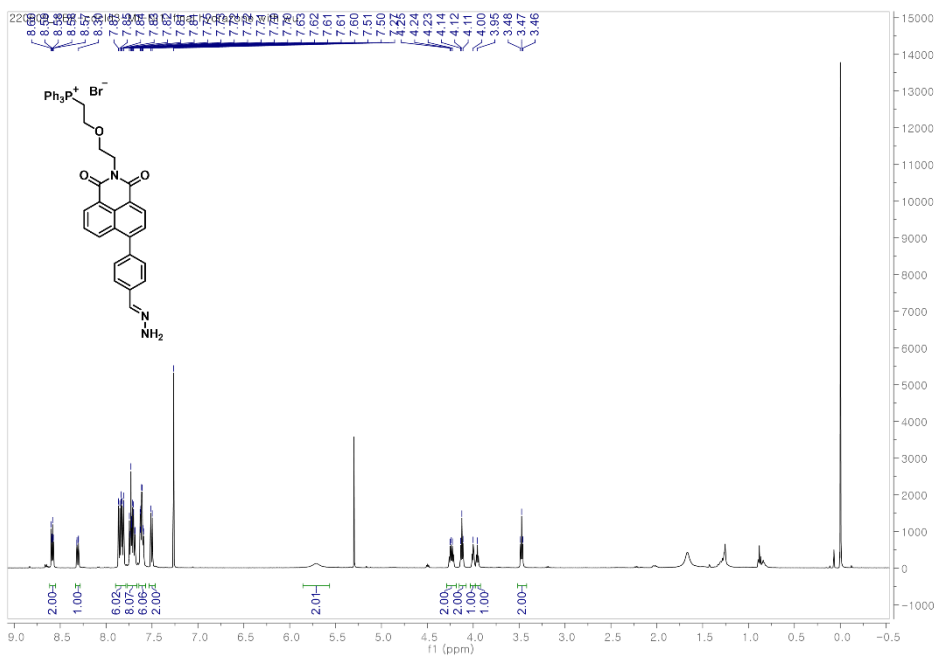

292

293

**Figure S13.**  $^1\text{H}$  NMR ( $\text{CDCl}_3$ , 500 MHz) spectrum of Mt-NI-1

294



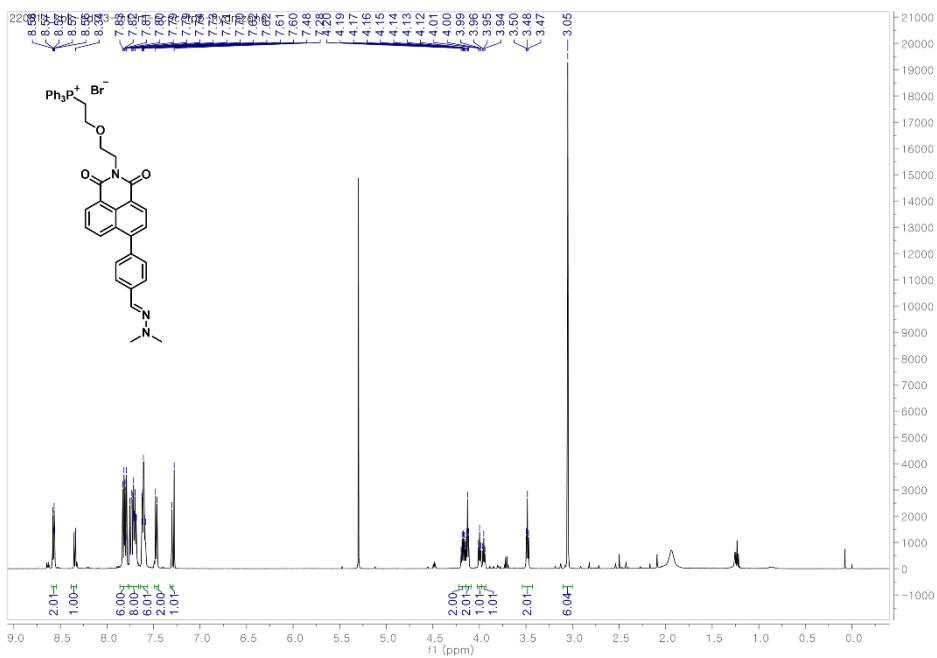

300

301

Figure S16.  $^1\text{H}$  NMR ( $\text{CDCl}_3$ , 500 MHz) spectrum of Mt-NI-2

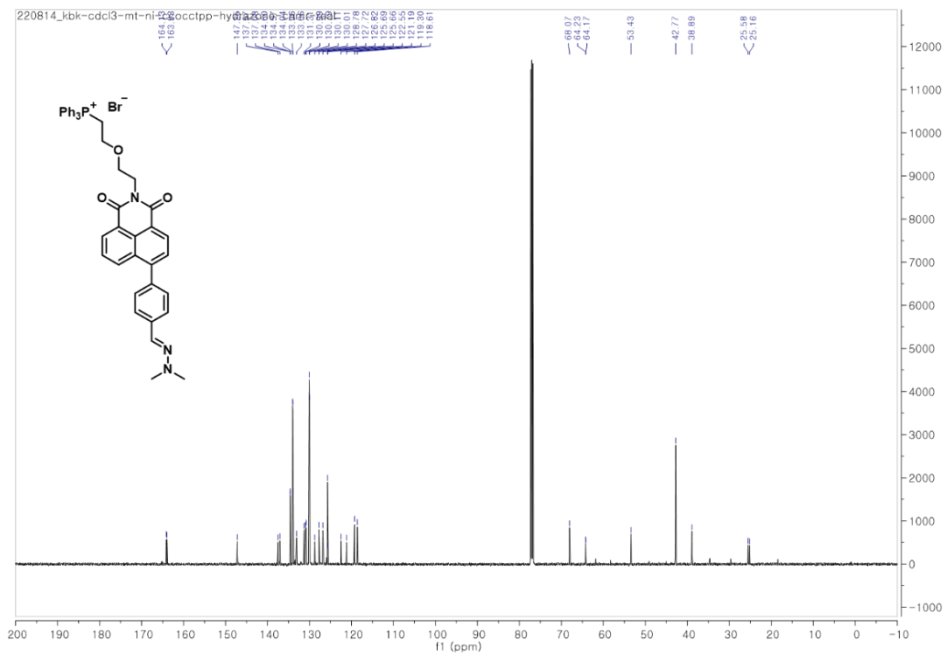

302

303

Figure S17.  $^{13}\text{C}$  NMR ( $\text{CDCl}_3$ , 125 MHz) spectrum of Mt-NI-2

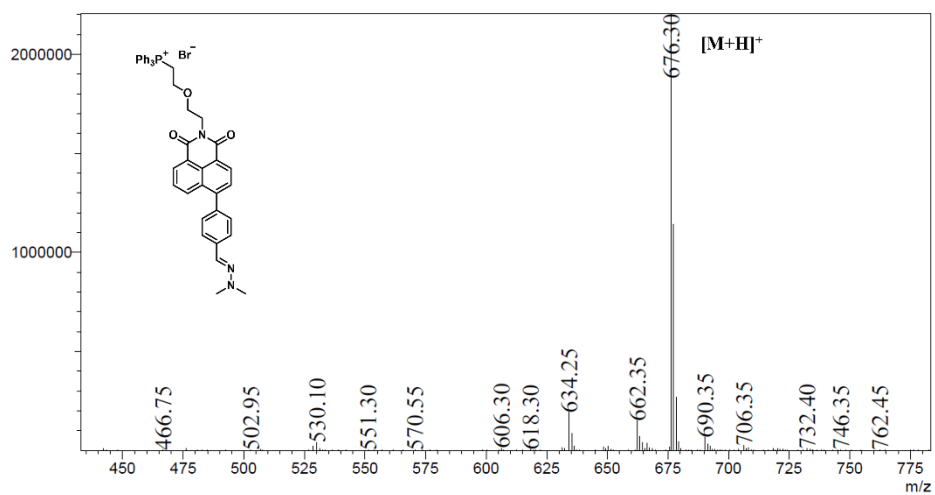

304

305

306

**Figure S18.** ESI-MS spectrum of Mt-NI-2

307 **3. Solution test experiments**

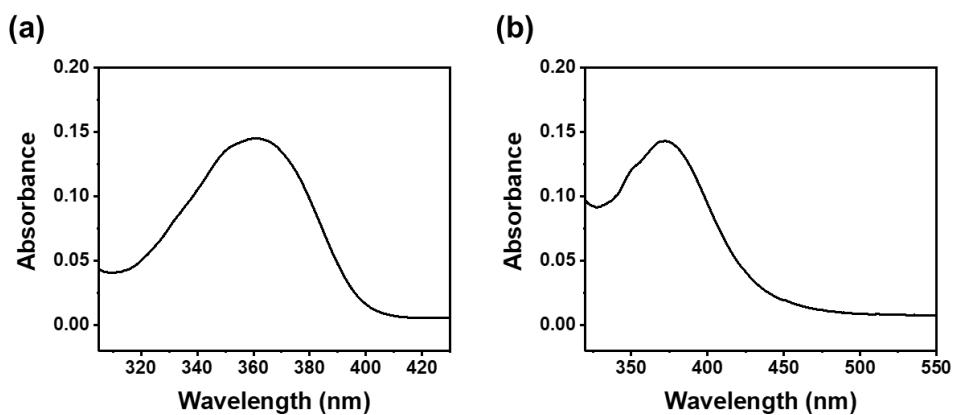

308

309 **Figure S19.** Absorption spectra of (a) **Mt-NI-Alde** and (a) **Mt-NI-2**

310

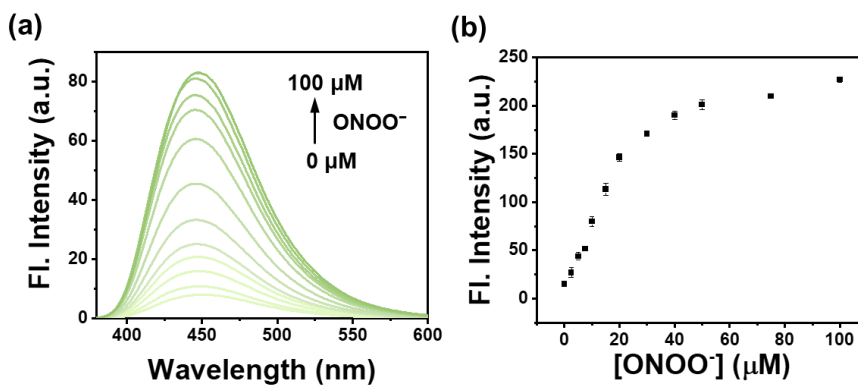

311

312 **Figure S20.** (a) Change in fluorescent intensity of **Mt-NI-1** (10  $\mu\text{M}$ ) with  $\text{ONOO}^-$   
313 (0-100  $\mu\text{M}$ ) (b) Plot of fluorescence intensity at 450 nm of **Mt-NI-1**,  $\lambda_{\text{ex}} = 361 \text{ nm}$ .

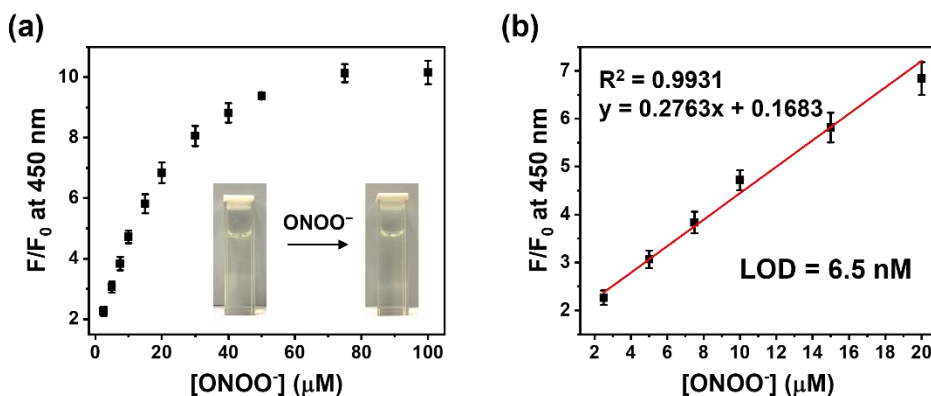

314

315 **Figure S21.** Titration of  $\text{ONOO}^-$  with **Mt-NI-2** (a) The plot of changes in fluorescence according to concentrations of  $\text{ONOO}^-$ ; Inset: optical change before and after addition of  $\text{ONOO}^-$ . (b) Parts of the plot of change in fluorescence according to concentrations of  $\text{ONOO}^-$  between 2.5  $\mu\text{M}$  to 20  $\mu\text{M}$  as a linear range.

319

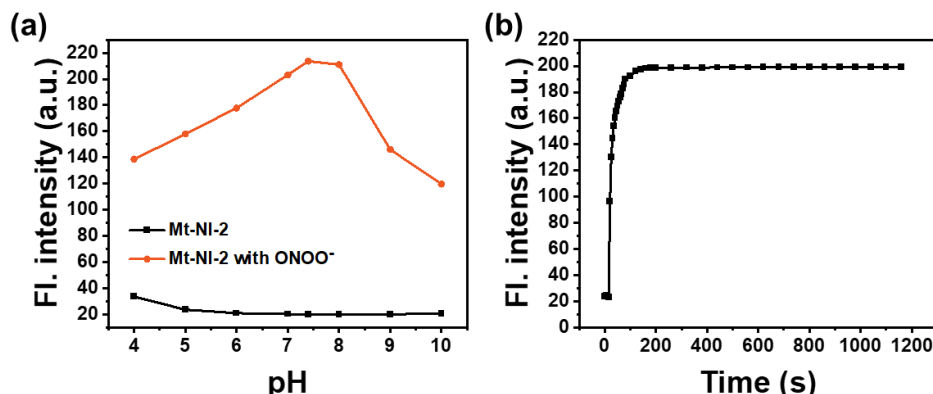

320

321 **Figure S22.** (a) Change in fluorescence intensity at 450 nm of **Mt-NI-2** (10  $\mu\text{M}$ )  
322 in the absence or presence of  $\text{ONOO}^-$  (50  $\mu\text{M}$ ) at various pH values. (b) Time-  
323 dependent fluorescent changes of **Mt-NI-2** (10  $\mu\text{M}$ ) upon addition of  $\text{ONOO}^-$  (50  
324  $\mu\text{M}$ ).

325

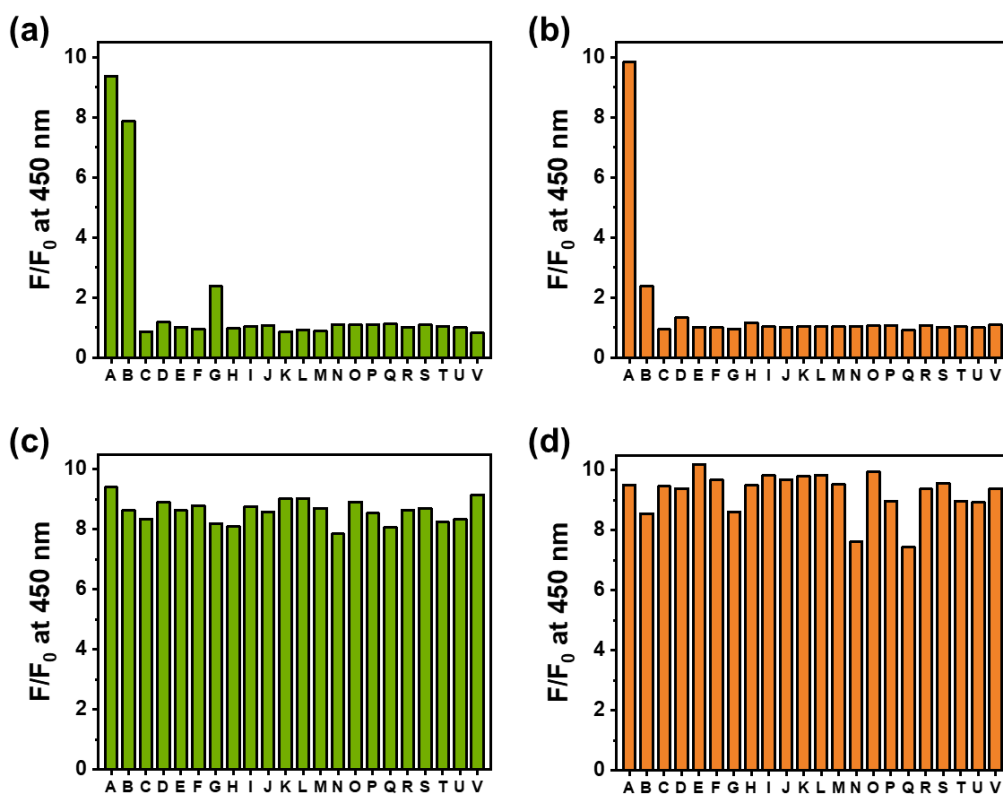

326

327 **Figure S23.** Change in fluorescence intensity of (a) **Mt-NI-1** (10 μM) and (b) **Mt-**  
 328 **NI-2** (10 μM) in presence of (A) 50 μM of ONOO<sup>-</sup> and 250 μM of various relevant  
 329 species (B) OCl<sup>-</sup> (C) HO<sup>·</sup> (D) ROO<sup>·</sup> (E) TBHP (F) <sup>1</sup>O<sub>2</sub> (G) O<sub>2</sub><sup>-</sup> (H) H<sub>2</sub>O<sub>2</sub> (I) NO  
 330 (J) NO<sub>2</sub><sup>-</sup> (K) NO<sub>3</sub><sup>-</sup> (L) Cl<sup>-</sup> (M) HCO<sub>3</sub><sup>-</sup> (N) H<sub>2</sub>PO<sub>4</sub><sup>-</sup> (O) Mg<sup>2+</sup> (P) Ca<sup>2+</sup> (Q) Cu<sup>2+</sup> (R)  
 331 Fe<sup>2+</sup> (S) L-Cys (T) Hcy (U) GSH (V) NaS in pH 7.4 PBS buffer. Change in  
 332 fluorescence intensity of (c) **Mt-NI-1** (10 μM) and (d) **Mt-NI-2** (10 μM) in  
 333 presence of (A) ONOO<sup>-</sup> only (50 μM) or 50 μM of ONOO<sup>-</sup> and 250 μM of various  
 334 relevant species. Alphabets are the same as (a).



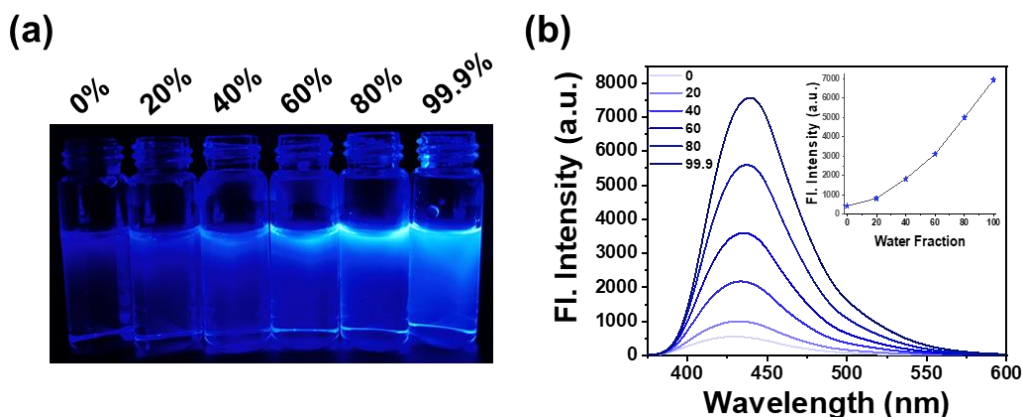

335

336 **Figure S24.** Fluorescence visualized image of **Mt-NI-Alde** in DMSO with  
 337 different water fractions under 365 nm UV handheld lamp. Change in fluorescence  
 338 intensity of the **Mt-NI-Alde** (10  $\mu\text{M}$ ) in DMSO with different water fractions,  $\lambda_{\text{ex}}$   
 339 = 361 nm.

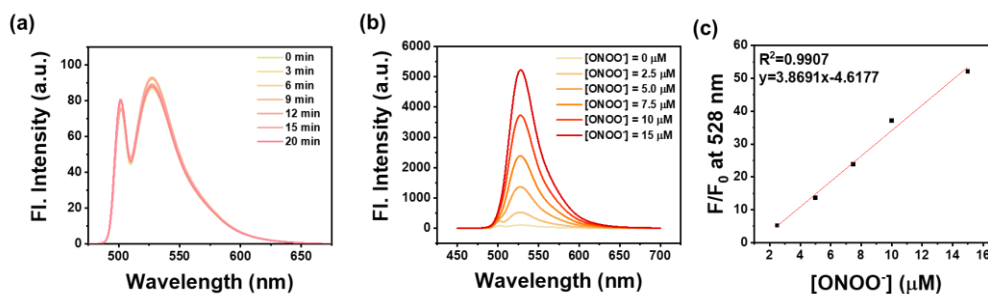

340

341 **Figure S25.** (a) Time-dependent fluorescence responses of DHR123 (10  $\mu\text{M}$ ) in  
 342 PBS solution. (b) Fluorescent spectra of DHR123 (10  $\mu\text{M}$ ) with  $\text{ONOO}^-$  titration  
 343 (0-15  $\mu\text{M}$ ),  $\lambda_{\text{ex}} = 505$  nm. (c) Plot of fluorescence intensity at 528 nm of DHR123,  
 344 which corresponds to  $\text{ONOO}^-$  concentration between 2.5  $\mu\text{M}$  to 15  $\mu\text{M}$ .

345

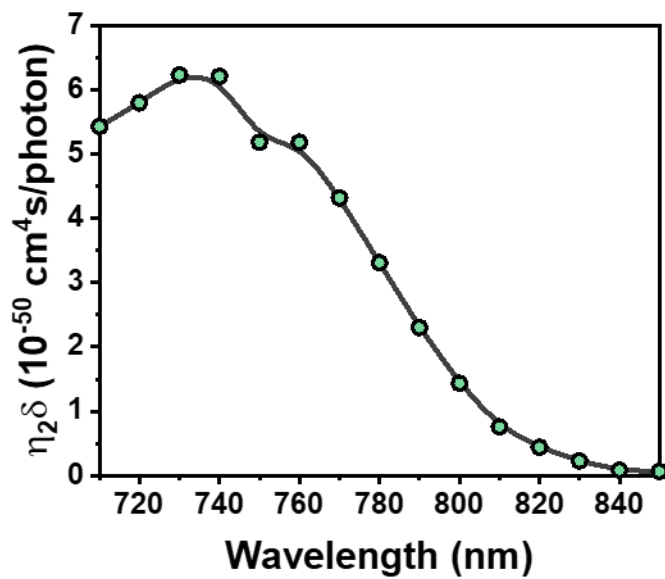

346

347 **Figure S26.** Two-photon fluorescence excitation spectra of **Mt-NI-2** ( $\eta_2$ : two-  
348 photon fluorescence quantum efficiency;  $\delta$ : two-photon absorption cross section).

349

350 **4. *In vitro* experiments**

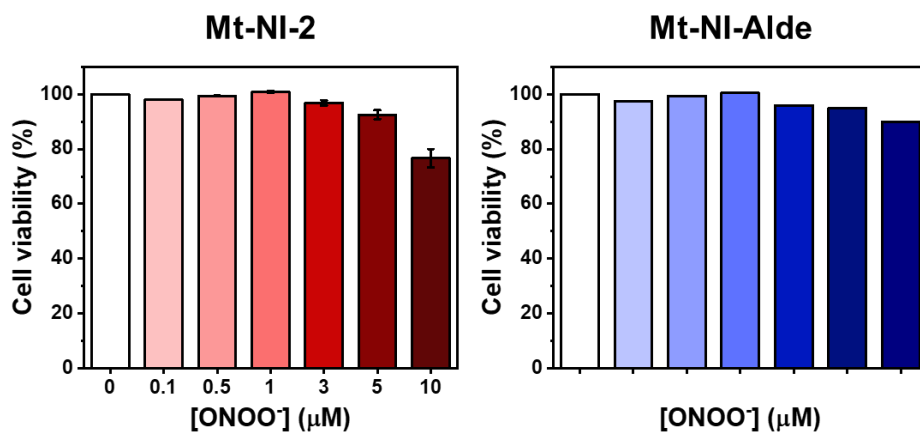

351

352 **Figure S27.** Cell viability of HeLa cells incubated with probe **Mt-NI-2** and its  
353 hydrolyzed form **Mt-NI-Alde** of different concentration (0, 0.1, 0.5, 1, 3, 5 or 10  
354 μM) for 6 h.

355

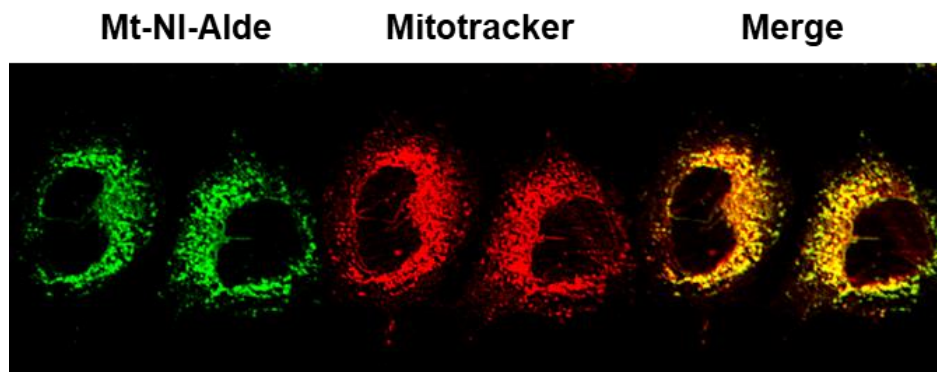

357 **Figure S28.** Fluorescence confocal images of HeLa cells costained with **Mt-NI-**  
358 **Alde** (5 μM, 30 min), and then MitoTracker Red FM (0.2 μM, 30 min). The image  
359 from the band path of 440–480 nm upon excitation of **Mt-NI-2** at 405 nm. For  
360 MitoTracker Red FM case, the excitation and emission bandpasses of the standard  
361 Cy5 filter set were used. Scale bar: 10 μm.

362

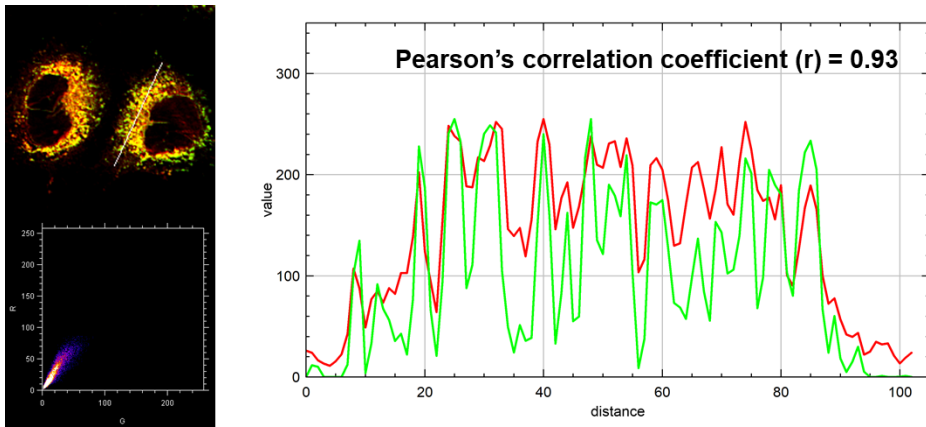

363

364 **Figure S29.** Co-location of **Mt-NI-2** (5  $\mu\text{M}$ ) and Mito-Tracker Red FM (0.2  $\mu\text{M}$ )  
365 HeLa cells were first pre-treated with LPS (1  $\text{g}\cdot\text{mL}^{-1}$ ) and IFN- $\gamma$  (100  $\text{ng}\cdot\text{mL}^{-1}$ ) for  
366 4 h, followed by PMA (10 nM).

367

368

369  
370

**Table 1.** Comparison list-up table of the representative ONOO<sup>-</sup> probes and Mt-NI-1 in this work.

| No. | Probe Name | Chemical Structure | M. W. (g/mol) | $\lambda_{\text{ex}}/\lambda_{\text{em}}$ (nm) | Condition                                                    | Linear range         | LOD                | [Ref] |
|-----|------------|--------------------|---------------|------------------------------------------------|--------------------------------------------------------------|----------------------|--------------------|-------|
| 1   | PNCy3Cy5   |                    | 1227.23       | 530/660                                        | 0.1 M PBS (pH 7.4, 0.2% DMF, v/v)                            | 0-0.7 $\mu\text{M}$  | 0.65 nM            | [7]   |
| 2   | MITO-CC    |                    | 820.95        | 420/473                                        | PBS/EtOH (pH 7.4, v/v, 7/3)                                  | 0-7.5 $\mu\text{M}$  | 11.3 nM            | [8]   |
| 3   | Probe 1    |                    | 718.69        | 450/550                                        | PBS (pH 7.4, 0.1 M 1% DMSO)                                  | n.d.                 | 184 nM             | [9]   |
| 4   | CC-ONOO    |                    | 530.66        | 640/698                                        | PBS (pH 7.4, 20% of CH <sub>3</sub> CN, v/v)                 | 0-30 $\mu\text{M}$   | 25 nM              | [10]  |
| 5   | Lyso-NA    |                    | 510.60        | 430/510                                        | CPBS (pH 5.0, 50% ethanol)                                   | 0-140 $\mu\text{M}$  | 0.24 nM            | [11]  |
| 6   | BP-PN      |                    | 456.45        | 375/525                                        | PBS (10 mM, pH 7.4) with 10 mM MgCl <sub>2</sub> at 37 °C    | 0.5-10 $\mu\text{M}$ | 200 nM             | [12]  |
| 7   | DCIPP      |                    | 490.53        | 527/665                                        | H <sub>2</sub> O/DMSO solution (1:1, v/v, 10 mM PBS, pH 7.4) | 0-15 $\mu\text{M}$   | 33 nM              | [13]  |
| 8   | BC-PN-2    |                    | 303.36        | 450/520                                        | PBS (pH 7.4, 50% DMSO)                                       | 7-17 $\mu\text{M}$   | 18 nM              | [14]  |
| 9   | LW-OTf     |                    | 693.67        | 675/710                                        | PBS (10 mM, pH 7.4)                                          | 0-4.2 $\mu\text{M}$  | 38.2 nM            | [15]  |
| 10  | BICBzBF    |                    | 651.62        | 345/538                                        | PBS (10 mM, 1% DMSO)                                         | 0-15 $\mu\text{M}$   | 0.27 $\mu\text{M}$ | [16]  |
| 11  | HD-Bpin    |                    | 741.51        | 360/460                                        | PBS (pH 7.2)                                                 | n.d.                 | 0.28 $\mu\text{M}$ | [17]  |
| 12  | K-ONOO     |                    | 540.89        | 525/678                                        | PBS (10 mM, pH 7.4, 1.5 mM CTAB)                             | 0-15 $\mu\text{M}$   | 212 nM             | [18]  |

371

| No. | Probe Name  | Chemical Structure                                                                  | M. W. (g/mol) | $\lambda_{ex}/\lambda_{em}$ (nm) | Condition                                       | Linear range  | LOD          | [Ref]     |
|-----|-------------|-------------------------------------------------------------------------------------|---------------|----------------------------------|-------------------------------------------------|---------------|--------------|-----------|
| 13  | Mito-HC-TZ  | 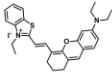   | 570.53        | 560/620,760                      | PBS (10 mM, pH 7.4, 50% DMSO)                   | 0–100 $\mu$ M | 210 nM       | [19]      |
| 14  | BICBzDP     |    | 741.83        | 549/576                          | PBS (pH 7.4, 1% DMSO)                           | 0–8 $\mu$ M   | 47.8 nM      | [20]      |
| 15  | NRho        |    | 424.49        | 530/579                          | PBS (pH 7.4)                                    | 0–100 $\mu$ M | 2.45 $\mu$ M | [21]      |
| 16  | W-3a        |    | 615.53        | 613/710                          | PBS (10 $\mu$ M, pH 7.4, 50% DMSO)              | 0–18 $\mu$ M  | 85 nM        | [22]      |
| 17  | Rd700-PN    |    | 785.12        | 570/702                          | PBS(0.5% DMF)                                   | 1–10 $\mu$ M  | 16.5 nM      | [23]      |
| 18  | HCy-OH-mito |    | 584.31        | 630/715                          | PBS (10 mM, pH 7.4)                             | 0–1 $\mu$ M   | 11.5 nM      | [24]      |
| 19  | Rh-3        |  | 498.62        | 530/561                          | PBS (pH 7.4, 20% DMF)                           | 2–18 $\mu$ M  | 21 nm        | [25]      |
| 20  | HBT-FI-BnB  |  | 940.09        | 340/396                          | PBS (10 $\mu$ M, pH 7.4, 5% THF, 0.2% Tween 80) | 0–25 $\mu$ M  | 2.1 $\mu$ M  | [26]      |
| 21  | Mt-NI-2     |  | 756.67        | 361/450                          | PBS (10 $\mu$ M, pH 7.4)                        | 0–20 $\mu$ M  | 6.5 nM       | This work |

372

373

374 **5. References**

- 375 1. A. C. Sedgwick, H. H. Han, J. E. Gardiner, S. D. Bull, X. P. He and T. D. James,  
376 *Chem. Commun.*, 2017, **53**, 12822-12825.
- 377 2. W. W. Wang, J. H. Xiong, X. J. Song, Z. Wang, F. Zhang and Z. Q. Mao, *Anal.*  
378 *Chem.*, 2020, **92**, 13305-13312.
- 379 3. N. Meher, S. Panda, S. Kumar and P. K. Iyer, *Chem. Sci.*, 2018, **9**, 3978-3985.
- 380 4. L. Y. Chen, S. J. Park, D. Wu, H. M. Kim and J. Yoon, *Chem. Commun.*, 2019,  
381 **55**, 1766-1769.
- 382 5. C. T. Lee, W. T. Yang and R. G. Parr, *Phys. Rev. B*, 1988, **37**, 785-789.
- 383 6. A. D. Mclean and G. S. Chandler, *J. Chem. Phys.*, 1980, **72**, 5639-5648.
- 384 7. X. T. Jia, Q. Q. Chen, Y. F. Yang, Y. Tang, R. Wang, Y. F. Xu, W. P. Zhu and X.  
385 H. Qian, *J. Am. Chem. Soc.*, 2016, **138**, 10778-10781.
- 386 8. D. Cheng, Y. Pan, L. Wang, Z. B. Zeng, L. Yuan, X. B. Zhang and Y. T. Chang,  
387 *J. Am. Chem. Soc.*, 2017, **139**, 285-292.
- 388 9. D. Lee, C. S. Lim, G. Ko, D. Kim, M. K. Cho, S. J. Nam, H. M. Kim and J.  
389 Yoon, *Anal. Chem.*, 2018, **90**, 9347-9352.
- 390 10. D. D. Liu, S. M. Feng and G. Q. Feng, *Sens. Actuator B-Chem.*, 2018, **269**, 15-  
391 21.
- 392 11. B. P. Guo, J. Jing, L. X. Nie, F. Y. Xin, C. C. Gao, W. Yang and X. L. Zhang,  
393 *J. Mater. Chem. B*, 2018, **6**, 580-585.
- 394 12. J. B. Li, L. L. Chen, Q. Q. Wang, H. W. Liu, X. X. Hu, L. Yuan and X. B.  
395 Zhang, *Anal. Chem.*, 2018, **90**, 4167-4173.
- 396 13. R. Q. Yuan, Y. H. Ma, J. Y. Du, F. X. Meng, J. J. Guo, M. Hong, Q. L. Yue, X.  
397 Li and C. Z. Li, *Anal. Methods*, 2019, **11**, 1522-1529.
- 398 14. Y. Fang, R. X. Chen, H. F. Qin, J. J. Wang, Q. Zhang, S. J. Chen, Y. H. Wen,  
399 K. P. Wang and Z. Q. Hu, *Sens. Actuator B-Chem.*, 2021, **334**, 129603.
- 400 15. L. L. Wu, J. H. Liu, X. Tian, R. R. Groleau, S. D. Bull, P. Li, B. Tang and T. D.  
401 James, *Chem. Sci.*, 2021, **12**, 3921-3928.

- 402 16. P. M. Sonawane, T. Yudhistira, M. B. Halle, A. Roychaudhury, Y. Kim, S. S.  
403 Surwase, V. K. Bhosale, J. Kim, H. S. Park, Y. C. Kim, C. H. Kim and D. G.  
404 Churchill, *Dyes Pigment.*, 2021, **191**, 109371.
- 405 17. H. R. Bolland, E. M. Hammond and A. C. Sedgwick, *Chem. Commun.*, 2022,  
406 **58**, 10699-10702.
- 407 18. H. Kang, W. Shu, J. Yu, M. X. Gao, R. B. Han, J. Jing, R. B. Zhang and X. L.  
408 Zhang, *Sens. Actuator B-Chem.*, 2022, **359**, 131393.
- 409 19. Q. Q. Liu, C. Dong, J. Zhang, B. Zhao, Y. Q. Zhou, C. H. Fan and Z. L. Lu,  
410 *Dyes Pigment.*, 2023, **210**, 111045.
- 411 20. P. M. Sonawane, W. Lee, Y. Kim, A. Roychaudhury, V. K. Bhosale, D. Kim, H.  
412 S. Park, C. H. Kim and D. G. Churchill, *Spectrochim. Acta A Mol. Biomol.*  
413 *Spectrosc.*, 2022, **267**, 120568.
- 414 21. G. L. Wu, Z. H. Li, P. Huang and W. Y. Lin, *J. Mater. Chem. B*, 2024, **12**, 3436-  
415 3444.
- 416 22. X. Wang, X. C. Wang, Z. X. Bai, K. Q. Du, J. L. Zhang and Q. X. Han, *Talanta*,  
417 2024, **270**, 125581.
- 418 23. J. K. Gong, X. Y. Wang, H. E. Fan, J. X. Wang, F. Zhang and Z. Q. Mao,  
419 *Talanta*, 2024, **267**, 125216.
- 420 24. X. W. Y. Liu, N. Fu, G. Wang, *Dyes Pigment.*, 2024, **225**, 112102.
- 421 25. S. J. Li, A. H. Mehmood, X. C. Tang, T. Yue and B. L. Dong, *Anal. Methods*,  
422 2024, **16**, 1409-1414.
- 423 26. Z. K. Wang, M. Yan, M. M. Yu, G. Zhang, W. W. Fang and F. B. Yu, *Anal.*  
424 *Chem.*, 2024, **96**, 3600-3608.

425
